# Supplementary material
Source: PubMed Central journal article supplement (PMC3739709)
Supplement: NIHMS487867-supplement-01.pdf [file NIHMS487867-supplement-01.pdf]

# Supplemental Figure 1

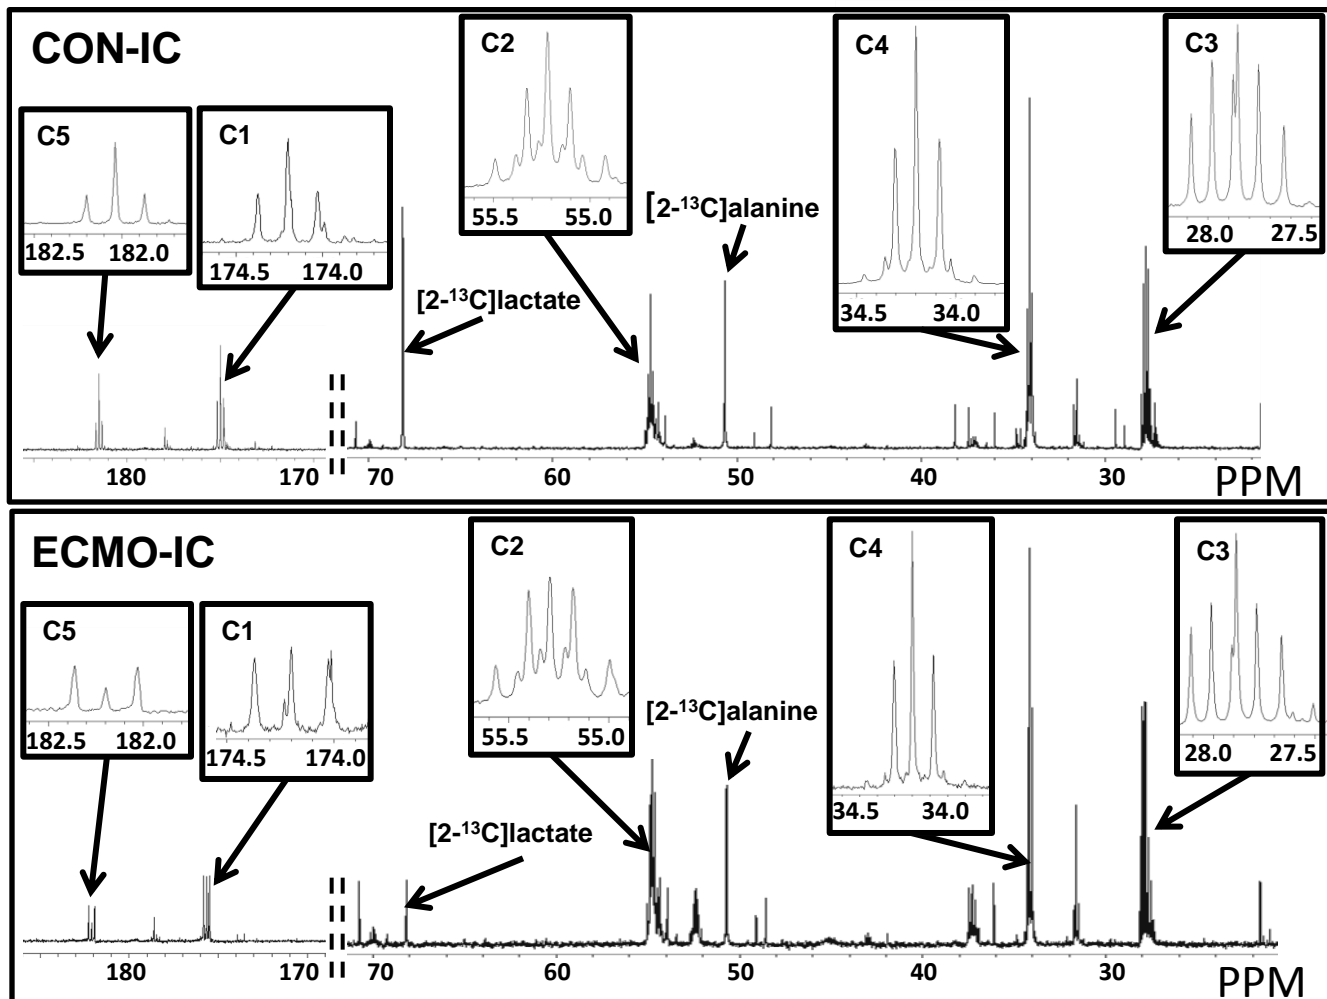

# Supplemental Figure 2

## A

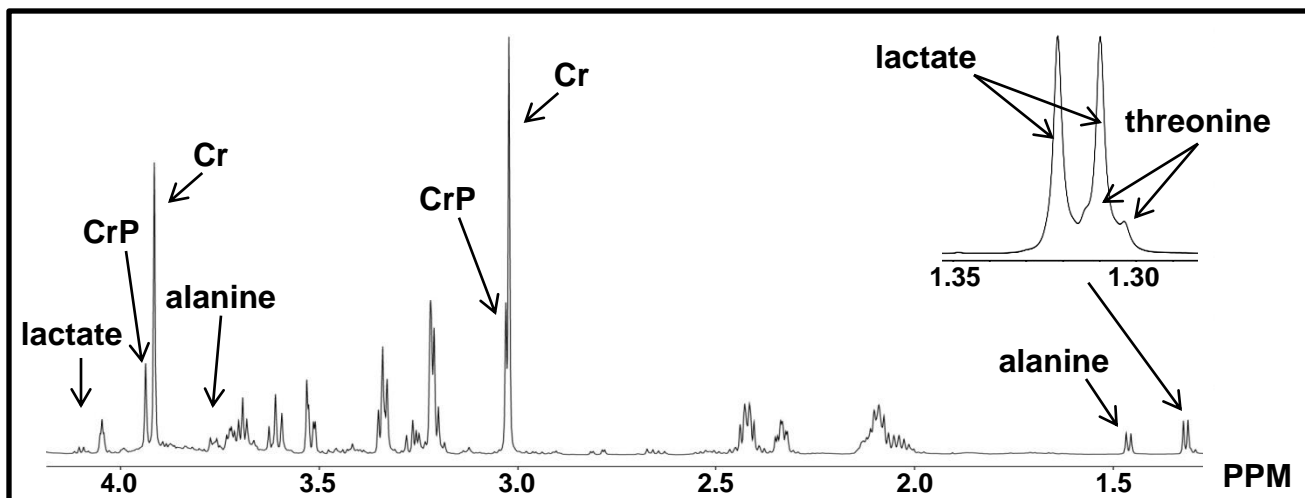

## B

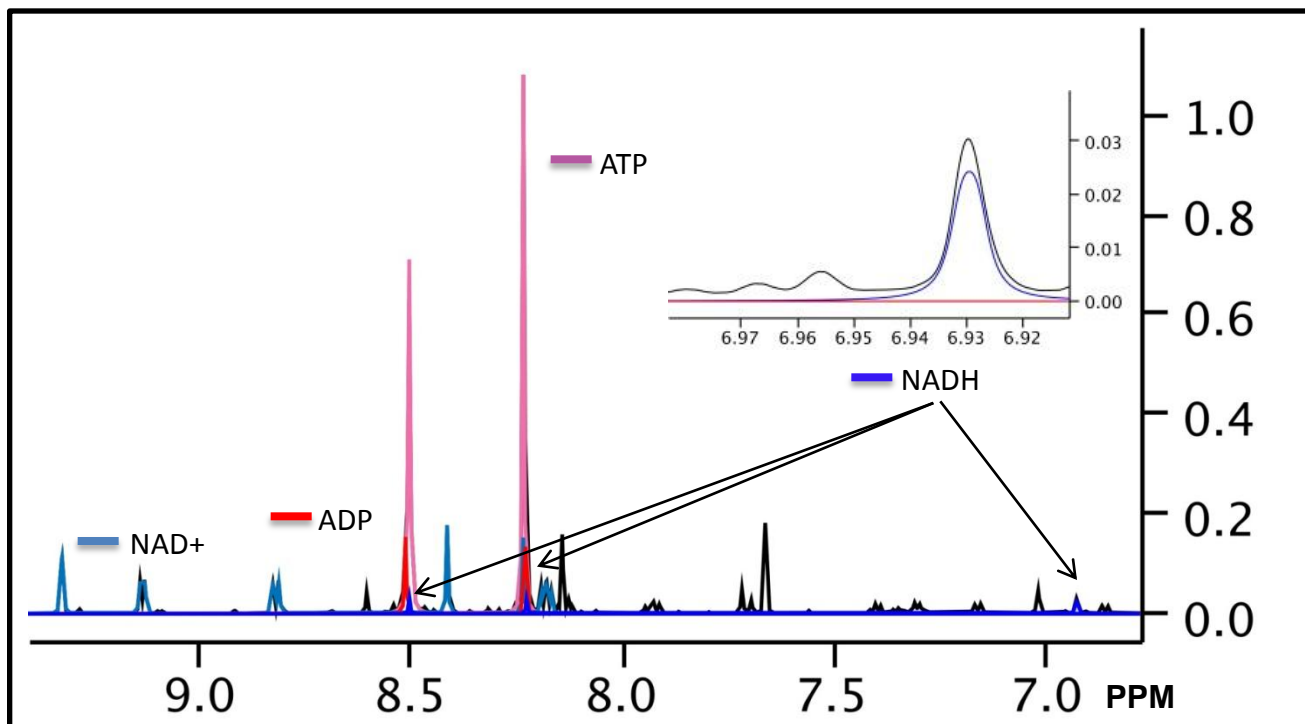

## Supplemental Figure Legends

**Supplemental Figure 1. Typical  $^{13}\text{C}$ -NMR spectra obtained from left ventricular extract after a 60-minute infusion of  $[2\text{-}^{13}\text{C}]$ lactate,  $[\text{U-}^{13}\text{C}]$ LFCAs and  $[2,4,6,8\text{-}^{13}\text{C}_4]$ octanoate into the left anterior descending coronary artery under Control and ECMO conditions.** The spectra show adequate signal to noise ratio for peak integration. Chemical shifts in parts per million (ppm) were as follows: C1, 174.2; C2, 55.2; C3, 27.7; C4, 34.2; C5 of glutamate, 182.2;  $[2\text{-}^{13}\text{C}]$ alanine, 51.9 and  $[2\text{-}^{13}\text{C}]$ lactate, 69.2. Marked differences occur in glutamate peak complexes between the two conditions. Especially C5 in ECMO-IC shows decreased singlet peak area and increased doublet peak area compared to CON-IC, indicating increased LFCA oxidation with unloading. Additionally, the greater labeled alanine to lactate ration can be observed after 8 hours of ECMO.

**Supplemental Figure 2.  $^1\text{H}$ -NMR spectra obtained from left ventricular extract at the end of protocol.** (A)  $^1\text{H}$ -NMR spectra of alanine, lactate and Creatine phosphate (CrP) in the expanded 1.3–4.3 ppm region. (B)  $^1\text{H}$ -NMR spectra of NAD, NADH, ATP and ADP in the expanded 6.8–9.5 ppm region. Each spectrally-separated spike was observable in this series of spectra. Typical spectra are shown.
